# Supplementary material for: Development and validation of a multigene variant profiling assay to guide targeted and immuno therapy selection in solid tumors
Source: PLoS One. 2021 Feb 8;16(2):e0246048. doi: 10.1371/journal.pone.0246048 (PMC7870065; doi:10.1371/journal.pone.0246048)
Supplement: S2 Table — (XLSX) [file pone.0246048.s002.xlsx]

## Sheet: Sheet1
Sample ID	Sample type	Cancer Types	Age	Gender	Variants and Actionability					Actionable Indications					Total Actionable	Indication
					NGS	PDL-1	MMR	MSI	TMB	NGS	PDL-1	MMR	MSI	TMB		Labelled	Off-Label	Both
200202644	FFPE	Bone	47	M	Y	Y	-	Y	Y	Y	-	-	-	Y	2	Y	Y	Y
191137185	FT	Breast	58	F	Y	Y	Y	-	Y	Y	-	-	-	-	1	Y	Y	Y
190301644	FT	Breast	71	F	Y	Y	Y	-	Y	Y	-	-	-	-	1	Y	Y	Y
190201407	FT	Breast	51	F	Y	Y	Y	-	Y	Y	Y	-	-	-	2	Y	Y	Y
190513366	FT	Breast	46	F	Y	Y	Y	-	Y	Y	-	-	-	-	1	Y	Y	Y
190824028	FT	Breast	44	F	Y	Y	Y	-	Y	Y	-	-	-	Y	2	Y	Y	Y
190930786	FFPE	Breast	49	F	Y	Y	Y	-	Y	Y	-	-	-	Y	2	Y	Y	Y
191137867	FT	Colorectal	65	M	Y	Y	Y	-	Y	Y	-	-	-	-	1	Y	Y	Y
191136258	FFPE	Colorectal	61	M	Y	Y	Y	-	Y	Y	-	-	-	-	1	Y	Y	Y
191136462	FT	Colorectal	50	M	Y	Y	Y	-	Y	Y	-	-	-	Y	2	Y	Y	Y
190721118	FFPE	Colorectal	37	M	Y	Y	Y	-	Y	Y	-	-	-	Y	2	Y	Y	Y
200203312	FFPE	Lung	41	F	Y	Y	-	Y	Y	Y	-	-	-	-	1	Y	Y	Y
200202695	FFPE	Lung	61	F	Y	Y	Y	-	Y	Y	Y	-	-	Y	3	Y	Y	Y
190303373	FFPE	Melanoma	42	F	Y	Y	Y	-	Y	Y	Y	-	-	-	2	Y	Y	Y
190303371	FFPE	Melanoma	48	F	Y	Y	Y	-	Y	Y	-	-	-	-	1	Y	Y	Y
190303372	FFPE	Melanoma	51	F	Y	Y	Y	-	Y	Y	Y	-	-	Y	3	Y	Y	Y
191138564	FT	Ovary	65	F	Y	Y	Y	-	Y	Y	-	-	-	-	1	Y	Y	Y
200202988	FFPE	Ovary	66	F	Y	Y	Y	-	Y	Y	-	-	-	Y	2	Y	Y	Y
200203231	FFPE	Pancreas	65	M	Y	Y	-	Y	Y	Y	-	-	-	-	1	Y	Y	Y
18051833	FT	Head and Neck	39	M	Y	-	-	Y	Y	-	-	-	-	-	-	-	-	-
191035475	FT	Bone	47	F	Y	Y	Y	-	Y	-	-	-	-	-	-	-	-	-
18127469	FFPE	Bone	19	F	Y	-	Y	-	Y	-	-	-	-	-	-	-	-	-
18072636	FT	Bone	21	M	Y	-	-	Y	Y	-	-	-	-	-	-	-	-	-
200202977	FFPE	Bone	58	M	Y	-	-	-	Y	-	-	-	-	Y	1	Y	-	N
18094924	FFPE	Bone	38	M	Y	-	-	-	Y	-	-	-	-	Y	1	Y	-	N
18061868	FFPE	Breast	42	F	Y	-	-	-	Y	-	-	-	-	-	-	-	-	-
190929503	FT	Breast	62	F	Y	Y	Y	-	Y	-	-	-	-	-	-	-	-	-
190302703	FT	Breast	45	F	Y	-	Y	-	Y	-	-	-	-	-	-	-	-	-
18061881	FT	Breast	53	F	Y	-	-	-	Y	-	-	-	-	-	-	-	-	-
19010085	FT	Breast	54	F	Y	-	Y	Y	Y	-	-	-	-	-	-	-	-	-
190303456	FFPE	Breast	77	F	Y	Y	Y	-	Y	-	-	-	-	-	-	-	-	-
18105414	FT	Breast	37	F	Y	-	-	-	Y	-	-	-	-	-	-	-	-	-
190824036	FT	Breast	44	F	Y	Y	Y	-	Y	-	-	-	-	-	-	-	-	-
18116038	FT	Breast	47	F	Y	-	-	-	Y	-	-	-	-	-	-	-	-	-
18095102	FFPE	Breast	58	F	Y	-	-	-	Y	-	-	-	-	-	-	-	-	-
200303687	FFPE	Breast	51	F	Y	Y	-	Y	Y	-	-	-	-	-	-	-	-	-
19010766	FT	Breast	65	F	Y	-	-	Y	Y	-	-	-	-	-	-	-	-	-
191135827	FT	Breast	51	F	Y	-	-	-	Y	-	-	-	-	-	-	-	-	-
191035448	FFPE	Breast	72	F	Y	Y	Y	-	Y	-	-	-	-	-	-	-	-	-
190928789	FT	Breast	47	F	Y	-	-	Y	Y	-	-	-	-	-	-	-	-	-
18062184	FFPE	Breast	58	F	Y	-	-	-	Y	-	-	-	-	-	-	-	-	-
190301658	FT	Breast	51	F	Y	Y	Y	-	Y	-	-	-	-	-	-	-	-	-
190721979	FT	Breast	55	F	Y	Y	Y	-	Y	-	-	-	-	-	-	-	-	-
18072717	FT	Breast	58	F	Y	-	-	Y	Y	-	-	-	-	-	-	-	-	-
18062218	FFPE	Breast	40	F	Y	-	-	-	Y	-	-	-	-	-	-	-	-	-
200202408	FFPE	Breast	63	F	Y	-	-	Y	Y	-	-	-	-	Y	1	Y	-	N
200101057	FT	Breast	57	F	Y	-	-	-	Y	-	-	-	-	Y	1	Y	-	N
191137866	FT	Breast	42	F	Y	Y	Y	-	Y	-	-	-	-	Y	1	Y	-	N
200202989	FFPE	Breast	52	F	Y	Y	Y	-	Y	-	-	-	-	Y	1	Y	-	N
190723080	FT	Breast	60	F	Y	Y	Y	-	Y	-	Y	-	-	Y	2	Y	-	N
18062258	FT	Breast	65	F	Y	-	-	-	Y	-	-	-	-	Y	1	Y	-	N
18083680	FFPE	Breast	45	F	Y	-	-	Y	-	-	-	-	-	-	-	-	-	-
190930441	FT	Breast + Hematolymphoid myeloid	69	F	Y	Y	Y	-	Y	-	-	-	-	-	-	-	-	-
18051747	FT	Cervix	44	F	Y	-	-	-	Y	-	-	-	-	-	-	-	-	-
191032315	FFPE	Cervix	60	F	Y	-	-	-	Y	-	-	-	-	Y	1	Y	-	N
19010715	FFPE	Cervix/Vagina	81	F	Y	Y	Y	-	Y	-	Y	-	-	Y	2	Y	-	N
18126752	FT	CNS	67	M	Y	-	Y	-	Y	-	-	-	-	-	-	-	-	-
18073115	FT	CNS	67	M	Y	-	-	Y	Y	-	-	-	-	-	-	-	-	-
190301721	FFPE	Colorectal	69	M	Y	-	Y	-	Y	-	-	-	-	-	-	-	-	-
18072972	FFPE	Colorectal	67	F	Y	-	-	-	Y	-	-	-	-	Y	1	Y	-	N
190721784	FFPE	Esophagus	67	M	Y	Y	Y	-	Y	-	Y	-	-	-	1	Y	-	N
18051784	FFPE	Esophagus	56	M	Y	-	-	-	Y	-	-	-	-	-	-		-	-
190615859	FT	Esophagus	66	M	Y	Y	Y	-	Y	-	-	-	-	Y	1	Y	-	N
190932082	FFPE	Esophagus	66	F	Y	Y	Y	-	Y	-	-	-	-	Y	1	Y	-	N
190928762	FFPE	Esophagus	70	F	Y	-	-	-	Y	-	-	-	-	Y	1	Y	-	N
18051772	FT	Gallbladder	32	F	Y	-	-	-	Y	-	-	-	-	-	-	-	-	-
190510800	FFPE	Gallbladder	49	M	Y	Y	Y	-	Y	-	Y	-	-	-	1	Y	-	N
190616620	FFPE	Gallbladder	59	M	Y	Y	Y	-	Y	-	-	-	-	Y	1	-	Y	N
18083847	FT	Gallbladder	47	F	Y	-	-	Y	Y	-	-	-	-	Y	1	-	Y	N
18084184	FT	Gastric	77	M	Y	-	-	Y	Y	-	-	-	-	-	-	Y	-	N
200202420	FFPE	Gastric	74	F	Y	Y	Y	-	Y	-	Y	-	-	-	1	Y	-	N
190201489	FFPE	Gastric	58	F	Y	-	-	-	Y	-	-	-	-	-	-		Y	N
18105636	FFPE	Gastric	40	F	Y	-	-	-	Y	-	-	-	-	-	-	Y	-	N
190823901	FFPE	Gastric	67	M	Y	-	-	-	Y	-	-	-	-	Y	1		Y	N
190403988	FT	Head and Neck	52	M	Y	Y	Y	-	Y	-	Y	-	-	-	1	Y	-	N
18072593	FT	Head and Neck	46	F	Y	-	-	Y	Y	-	-	-	-	-	-	Y	-	N
18062343	FT	Head and Neck	42	M	Y	-	-	-	Y	-	-	-	-	-	-	-	-	-
19010841	FT	Head and Neck	50	M	Y	Y	-	Y	Y	-	Y	-	-	Y	2	Y	-	N
18051785	FT	Head and Neck	51	M	Y	-	-	-	Y	-	-	-	-	Y	1	-	Y	N
18051750	FFPE	Head and Neck	42	M	Y	-	-	-	Y	-	-	-	-	Y	1	-	Y	N
18084024	FT	Kidney	66	M	Y	-	-	Y	Y	-	-	-	-	-	-	-	-	-
190405575	FFPE	Kidney	88	M	Y	-	Y	-	Y	-	-	-	-	-	-	-	-	-
18062178	FT	Liver	65	M	Y	-	-	-	Y	-	-	-	-	-	-	-	-	-
190823764	FT	Liver	70	M	Y	-	-	-	Y	-	-	-	-	Y	1	-	Y	N
200203232	FFPE	Liver	60	M	Y	Y	-	Y	Y	-	-	-	-	Y	1	-	Y	N
190823842	FT	Lung	41	F	Y	Y	Y	-	Y	-	-	-	-	-	-	-	-	-
18051751	FT	Lung	49	M	Y	-	-	-	Y	-	-	-	-	Y	1	Y	-	N
190614531	FT	Lung	57	M	Y	Y	Y	-	Y	-	-	-	-	Y	1	Y	-	N
18061917	FFPE	Lung	73	M	Y	-	-	-	Y	-	-	-	-	Y	1	Y	-	N
18083932	FT	Lung	54	F	Y	-	-	Y	Y	-	-	-	-	Y	1	Y	-	N
18094834	FFPE	Lung	64	F	Y	-	-	Y	Y	-	-	-	-	Y	1	Y	-	N
190303189	FFPE	Lung	36	F	Y	Y	Y	-	Y	-	-	-	-	Y	1	Y	-	N
190302049	FT	Lung	62	M	Y	-	-	Y	Y	-	-	-	-	Y	1	Y	-	N
18116170	FT	Lung	61	M	Y	Y	Y	-	Y	-	-	-	-	Y	1	Y	-	N
190301856	FFPE	Lung	68	M	Y	Y	Y	-	-	-	-	-	-	-	-	-	-	-
18041351	FFPE	Lung	69	F	Y	-	-	-	-	-	-	-	-	-	-	-	-	-
19010831	FT	Melanoma	81	F	Y	Y	-	Y	Y	-	Y	-	-	-	1	Y	-	N
190824201	FT	Melanoma	60	M	Y	-	-	-	Y	-	-	-	-	-	-	-	-	-
190303166	FT	Melanoma	30	F	Y	-	-	Y	Y	-	-	-	-	Y	1	Y	-	N
200203328	FFPE	Mesothelioma	54	F	Y	Y	-	Y	Y	-	-	-	-	-	-	-	-	-
18116239	FT	Mesothelioma	51	M	Y	Y	Y	-	Y	-	-	-	-	-	-	-	-	-
19010696	FFPE	Mesothelioma	56	M	Y	-	-	-	Y	-	-	-	-	-	-	-	-	-
190302158	FT	NET	49	M	Y	-	-	Y	Y	-	-	-	-	-	-	-	-	-
191239591	FFPE	NET	57	M	Y	Y	Y	Y	Y	-	-	-	-	-	-	-	-	-
18051773	FT	Ovary	62	F	Y	-	-	-	Y	-	-	-	-	-	-	-	-	-
18126562	FFPE	Ovary	37	F	Y	-	-	-	Y	-	-	-	-	Y	1	-	Y	N
190824205	FFPE	Ovary	63	F	Y	-	-	-	Y	-	-	-	-	Y	1	-	Y	N
200100120	FFPE	Ovary	49	F	Y	-	-	-	Y	-	-	-	-	-	-	-	-	-
190302240	FFPE	Ovary + Breast	77	F	Y	-	-	-	Y	-	-	-	-	-	-	-	-	-
18116360	FFPE	Pancreas	83	M	Y	-	-	-	Y	-	-	-	-	-	-	-	-	-
200303860	FFPE	Pancreas	70	M	Y	-	-	Y	Y	-	-	-	-	-	-	-	-	-
200202990	FFPE	Pancreaticobiliary	59	M	Y	Y	Y	-	Y	-	-	-	-	-	-	-	-	-
18072671	FFPE	Prostate	75	M	Y	-	-	Y	Y	-	-	-	-	-	-	-	-	-
18062158	FT	Sarcoma	46	F	Y	-	-	-	Y	-	-	-	-	-	-	-	-	-
190615091	FT	Sarcoma	40	M	Y	Y	Y	-	Y	-	-	-	-	-	-	-	-	-
191035463	FFPE	Sarcoma	52	F	Y	Y	Y	-	Y	-	-	-	-	-	-	-	-	-
191034621	FT	Sarcoma	41	M	Y	Y	Y	-	Y	-	-	-	-	-	-	-	-	-
18084293	FT	Sarcoma	30	M	Y	-	-	Y	Y	-	-	-	-	-	-	-	-	-
18116406	FT	Sarcoma	41	F	Y	-	Y	-	Y	-	-	-	-	-	-	-	-	-
18083872	FT	Sarcoma	55	F	Y	-	-	Y	Y	-	-	-	-	-	-	-	-	-
18116195	FT	Sarcoma	41	F	Y	-	-	-	Y	-	-	-	-	-	-	-	-	-
190510895	FT	Sarcoma	49	F	Y	Y	Y	-	Y	-	-	-	-	-	-	Y	-	N
190722031	FFPE	Sarcoma	33	F	Y	Y	Y	-	Y	-	-	-	-	Y	1	Y	-	N
200202075	FFPE	Sarcoma	68	M	Y	Y	Y	-	-	-	-	-	-	-	-	-	-	-
191136374	FFPE	Skin	36	F	Y	Y	-	Y	Y	-	-	-	-	-	-	-	-	-
190931750	FFPE	Skin	51	M	Y	-	-	-	Y	-	-	-	-	-	-	-	-	-
18116222	FT	Thymus	54	M	Y	-	Y	-	Y	-	-	-	-	-	-	-	-	-
18083773	FT	Unknown Primary	47	M	Y	-	-	Y	Y	-	-	-	-	Y	1	Y	-	N
18126859	FT	Uterine	54	F	Y	-	Y	-	Y	-	-	-	-	-	-	-	-	-
190405954	FFPE	Uterine	68	F	Y	Y	Y	-	Y	-	-	-	-	-	-	-	-	-
18094745	FT	Uterine	61	F	Y	-	-	Y	Y	-	-	-	-	Y	1	Y	-	N
18072928	FFPE	Uterine	69	F	Y	-	-	-	Y	-	-	-	-	Y	1	Y	-	N
18115951	FT	Uterine	60	F	Y	-	-	-	-	-	-	-	-	-	-	-	-	-
18127373	FFPE	Bile Duct	53	M	-	-	Y	-	-	-	-	-	-	-	-	-	-	-
191135717	FT	Bile Duct	72	M	-	Y	-	Y	-	-	-	-	-	-	-	-	-	-
18126883	FFPE	Bile Duct	67	F	-	Y	Y	-	-	-	-	-	-	-	-	-	-	-
191239607	FFPE	Bladder	65	M	-	Y	Y	Y	-	-	-	-	-	-	-	-	-	-
191239566	FFPE	Bone	61	F	-	Y	Y	-	-	-	-	-	-	-	-	-	-	-
18126702	FT	Bone	18	M	-	-	Y	-	-	-	-	-	-	-	-	-	-	-
190823601	FFPE	Breast	49	F	-	-	-	Y	-	-	-	-	Y	-	1	Y	-	N
190722990	FFPE	Breast	59	F	-	Y	-	Y	-	-	-	-	-	-	-	-	-	-
190722984	FFPE	Breast	38	F	-	Y	-	Y	-	-	-	-	-	-	-	-	-	-
190824892	FFPE	Breast	67	F	-	Y	-	Y	-	-	-	-	-	-	-	-	-	-
190824891	FFPE	Breast	41	F	-	Y	-	Y	-	-	-	-	-	-	-	-	-	-
190825479	FFPE	Breast	34	F	-	Y	-	Y	-	-	-	-	-	-	-	-	-	-
190929421	FFPE	Breast	52	F	-	Y	-	Y	-	-	-	-	-	-	-	-	-	-
191139204	FFPE	Breast	59	F	-	Y	-	Y	-	-	-	-	-	-	-	-	-	-
18084491	FT	Breast	74	F	-	-	-	Y	-	-	-	-	-	-	-	-	-	-
18094772	FT	Breast	53	F	-	-	-	Y	-	-	-	-	-	-	-	-	-	-
18094824	FT	Breast	28	F	-	-	-	Y	-	-	-	-	-	-	-	-	-	-
18010156	FT	Breast	53	F	-	-	-	Y	-	-	-	-	-	-	-	-	-	-
18020539	FT	Breast	37	F	-	-	-	Y	-	-	-	-	-	-	-	-	-	-
18020592	FT	Breast	26	F	-	-	-	Y	-	-	-	-	-	-	-	-	-	-
18030757	FT	Breast	26	F	-	-	-	Y	-	-	-	-	-	-	-	-	-	-
18030855	FT	Breast	61	F	-	-	-	Y	-	-	-	-	-	-	-	-	-	-
18051472	FT	Breast	49	F	-	-	-	Y	-	-	-	-	-	-	-	-	-	-
18051622	FT	Breast	73	F	-	-	-	Y	-	-	-	-	-	-	-	-	-	-
190615868	FFPE	Breast	30	F	-	-	-	Y	-	-	-	-	-	-	-	-	-	-
191035334	FFPE	Breast	67	F	-	-	-	Y	-	-	-	-	-	-	-	-	-	-
19010710	FFPE	Breast	64	F	-	Y	-	-	-	-	Y	-	-	-	1	Y	-	N
190301921	FFPE	Breast	45	F	-	Y	Y	-	-	-	Y	-	-	-	1	Y	-	N
190721021	FFPE	Breast	64	F	-	Y	-	-	-	-	Y	-	-	-	1	Y	-	N
18127455	FFPE	Breast	41	F	-	Y	-	-	-	-	-	-	-	-	-	-	-	-
190620394	FFPE	Breast	56	F	-	Y	-	-	-	-	-	-	-	-	-	-	-	-
190825480	FFPE	Breast	53	F	-	Y	-	-	-	-	-	-	-	-	-	-	-	-
190827638	FFPE	Breast	65	F	-	Y	Y	-	-	-	-	-	-	-	-	-	-	-
191032564	FFPE	Breast	60	F	-	Y	-	-	-	-	-	-	-	-	-	-	-	-
191239460	FFPE	Cervix	66	F	-	Y	-	Y	-	-	-	-	-	-	-	-	-	-
18041296	FFPE	Cervix	60	F	-	-	-	Y	-	-	-	-	-	-	-	-	-	-
190824945	FT	CNS	53	M	-	-	-	Y	-	-	-	-	Y	-	1	Y	-	N
18094883	FT	CNS	61	M	-	-	-	Y	-	-	-	-	-	-	-	-	-	-
17126943	FFPE	CNS	53	F	-	-	-	Y	-	-	-	-	-	-	-	-	-	-
18020411	FFPE	CNS	60	M	-	-	-	Y	-	-	-	-	-	-	-	-	-	-
18020340	FT	CNS	60	F	-	-	-	Y	-	-	-	-	-	-	-	-	-	-
18094516	FFPE	Colorectal	34	F	-	-	-	Y	-	-	-	-	Y	-	1	Y	-	N
190201490	FFPE	Colorectal	53	M	-	-	-	Y	-	-	-	-	Y	-	1	Y	-	N
190406801	FFPE	Colorectal	53	F	-	-	-	Y	-	-	-	-	Y	-	1	Y	-	N
190512102	FT	Colorectal	39	F	-	-	-	Y	-	-	-	-	Y	-	1	Y	-	N
190722038	FFPE	Colorectal	68	M	-	Y	-	Y	-	-	-	-	-	-	-	-	-	-
190823602	FFPE	Colorectal	65	F	-	Y	-	Y	-	-	-	-	-	-	-	-	-	-
191135610	FFPE	Colorectal	49	F	-	Y	-	Y	-	-	-	-	-	-	-	-	-	-
191137221	FFPE	Colorectal	61	F	-	Y	-	Y	-	-	-	-	-	-	-	-	-	-
18084443	FT	Colorectal	33	M	-	-	-	Y	-	-	-	-	-	-	-	-	-	-
18020642	FT	Colorectal	64	M	-	-	-	Y	-	-	-	-	-	-	-	-	-	-
18030739	FT	Colorectal	24	F	-	-	-	Y	-	-	-	-	-	-	-	-	-	-
18030772	FFPE	Colorectal	39	F	-	-	-	Y	-	-	-	-	-	-	-	-	-	-
18041385	FT	Colorectal	29	M	-	-	-	Y	-	-	-	-	-	-	-	-	-	-
18010050	FT	Colorectal	41	M	-	-	-	Y	-	-	-	-	-	-	-	-	-	-
18072893	FFPE	Colorectal	54	F	-	-	-	Y	-	-	-	-	-	-	-	-	-	-
18083681	FFPE	Colorectal	54	F	-	-	-	Y	-	-	-	-	-	-	-	-	-	-
190301633	FFPE	Colorectal	63	F	-	-	-	Y	-	-	-	-	-	-	-	-	-	-
190406797	FFPE	Colorectal	41	M	-	-	-	Y	-	-	-	-	-	-	-	-	-	-
190721867	FFPE	Colorectal	28	M	-	-	-	Y	-	-	-	-	-	-	-	-	-	-
18084458	FT	Colorectal	60	M	-	-	-	Y	-	-	-	-	-	-	-	-	-	-
18127063	FFPE	Colorectal	67	F	-	-	Y	-	-	-	-	-	-	-	-	-	-	-
18126938	FFPE	Colorectal	62	F	-	-	Y	-	-	-	-	-	-	-	-	-	-	-
18127251	FFPE	Colorectal	57	F	-	-	Y	-	-	-	-	-	-	-	-	-	-	-
19010079	FFPE	Colorectal	33	F	-	-	Y	-	-	-	-	-	-	-	-	-	-	-
19010080	FFPE	Colorectal	59	F	-	-	Y	-	-	-	-	-	-	-	-	-	-	-
190201155	FFPE	Colorectal	62	M	-	-	Y	-	-	-	-	-	-	-	-	-	-	-
190720858	FFPE	Colorectal	64	F	-	-	Y	-	-	-	-	-	-	-	-	-	-	-
190827644	FFPE	Colorectal	68	F	-	-	Y	-	-	-	-	-	-	-	-	-	-	-
18127471	FFPE	Colorectal	56	M	-	-	Y	-	-	-	-	-	-	-	-	-	-	-
19010538	FT	Esophagus	66	F	-	-	-	Y	-	-	-	-	-	-	-	-	-	-
191138582	FFPE	Esophagus	44	M	-	Y	-	-	-	-	-	-	-	-	-	-	-	-
191136076	FFPE	Gallbladder	48	F	-	Y	-	Y	-	-	-	-	-	-	-	-	-	-
18084330	FT	Gallbladder	57	F	-	-	-	Y	-	-	-	-	-	-	-	-	-	-
191035148	FFPE	Gallbladder	75	M	-	-	-	Y	-	-	-	-	-	-	-	-	-	-
190616831	FFPE	Gallbladder	60	F	-	Y	Y	-	-	-	-	-	-	-	-	-	-	-
18127425	FT	Gallbladder	53	F	-	-	Y	-	-	-	-	-	-	-	-	-	-	-
191032562	FFPE	Gastric	61	M	-	Y	-	Y	-	-	-	-	-	-	-	-	-	-
191240121	FT	Gastric	35	M	-	-	-	Y	-	-	-	-	-	-	-	-	-	-
18061961	FT	Gastric	40	F	-	-	-	Y	-	-	-	-	-	-	-	-	-	-
18095011	FT	Gastric	53	M	-	-	-	Y	-	-	-	-	-	-	-	-	-	-
18020341	FFPE	Gastric	68	M	-	-	-	Y	-	-	-	-	-	-	-	-	-	-
18094517	FFPE	Gastric	36	M	-	-	-	Y	-	-	-	-	-	-	-	-	-	-
18126811	FFPE	Gastric	40	M	-	Y	-	-	-	-	Y	-	-	-	1	Y	-	N
190619299	FFPE	Gastric	36	M	-	Y	-	-	-	-	-	-	-	-	-	-	-	-
190827639	FFPE	Gastric	53	F	-	Y	Y	-	-	-	-	-	-	-	-	-	-	-
18030892	FT	Gastric + Liver	51	M	-	-	-	Y	-	-	-	-	-	-	-	-	-	-
18094816	FT	Gastric + Small Intestine	70	M	-	-	-	Y	-	-	-	-	-	-	-	-	-	-
18051473	FT	Head and Neck	43	F	-	-	-	Y	-	-	-	-	-	-	-	-	-	-
18094744	FT	Head and Neck	47	M	-	-	-	Y	-	-	-	-	-	-	-	-	-	-
19010416	FT	Head and Neck	43	M	-	-	-	Y	-	-	-	-	-	-	-	-	-	-
18084378	FT	Head and Neck	45	M	-	-	-	Y	-	-	-	-	-	-	-	-	-	-
18020489	FT	Head and Neck	55	M	-	-	-	Y	-	-	-	-	-	-	-	-	-	-
18094788	FT	Head and Neck	38	M	-	-	-	Y	-	-	-	-	-	-	-	-	-	-
19010455	FT	Head and Neck	38	M	-	-	-	Y	-	-	-	-	-	-	-	-	-	-
18094639	FT	Head and Neck	67	M	-	-	-	Y	-	-	-	-	-	-	-	-	-	-
191035186	FFPE	Head and Neck	66	M	-	-	-	Y	-	-	-	-	-	-	-	-	-	-
191034236	FFPE	Head and Neck	63	M	-	Y	-	-	-	-	-	-	-	-	-	-	-	-
18127250	FFPE	Head and Neck	53	M	-	Y	-	-	-	-	-	-	-	-	-	-	-	-
190721434	FFPE	Head and Neck	51	M	-	Y	-	-	-	-	-	-	-	-	-	-	-	-
18126724	FT	Head and Neck	35	M	-	-	Y	-	-	-	-	-	-	-	-	-	-	-
190302012	FT	Head and Neck	57	M	-	-	Y	-	-	-	-	-	-	-	-	-	-	-
19010035	FT	Head and Neck	50	M	-	-	Y	-	-	-	-	-	-	-	-	-	-	-
190720608	FFPE	Kidney	70	M	-	Y	Y	-	-	-	-	-	-	-	-	-	-	-
18010027	FT	Liver	62	M	-	-	-	Y	-	-	-	-	-	-	-	-	-	-
18094773	FT	Liver	70	M	-	-	-	Y	-	-	-	-	-	-	-	-	-	-
18094861	FT	Liver	70	M	-	-	-	Y	-	-	-	-	-	-	-	-	-	-
190301603	FFPE	Liver	73	F	-	Y	Y	-	-	-	-	-	-	-	-	-	-	-
18094611	FT	Lung	59	M	-	-	-	Y	-	-	-	-	-	-	-	-	-	-
190928851	FFPE	Lung	65	M	-	Y	-	-	-	-	-	-	-	-	-	-	-	-
191033051	FFPE	Ovary	58	F	-	Y	Y	-	-	-	-	-	-	-	-	-	-	-
19010096	FT	Ovary	62	F	-	-	Y	Y	-	-	-	-	-	-	-	-	-	-
18030884	FFPE	Ovary	62	F	-	-	-	Y	-	-	-	-	-	-	-	-	-	-
18041260	FFPE	Ovary	56	F	-	-	-	Y	-	-	-	-	-	-	-	-	-	-
18051623	FT	Ovary	49	F	-	-	-	Y	-	-	-	-	-	-	-	-	-	-
18062020	FFPE	Ovary	44	F	-	-	-	Y	-	-	-	-	-	-	-	-	-	-
18062061	FT	Ovary	44	F	-	-	-	Y	-	-	-	-	-	-	-	-	-	-
190406743	FFPE	Ovary	52	F	-	-	-	Y	-	-	-	-	-	-	-	-	-	-
190511905	FT	Ovary	44	F	-	-	-	Y	-	-	-	-	-	-	-	-	-	-
190201073	FFPE	Ovary	55	F	-	Y	Y	-	-	-	Y	-	-	-	1	Y	-	N
18127352	FT	Ovary	64	F	-	-	Y	-	-	-	-	-	-	-	-	-	-	-
190302683	FFPE	Pancreas	56	M	-	-	Y	-	-	-	-	-	-	-	-	-	-	-
190721435	FFPE	Pancreas	48	M	-	Y	-	Y	-	-	-	-	-	-	-	-	-	-
18094597	FT	Pancreas	71	M	-	-	-	Y	-	-	-	-	-	-	-	-	-	-
18094823	FT	Pancreas	69	M	-	-	-	Y	-	-	-	-	-	-	-	-	-	-
18084245	FT	Pancreas	50	M	-	-	-	Y	-	-	-	-	-	-	-	-	-	-
18095014	FT	Pancreas	46	M	-	-	-	Y	-	-	-	-	-	-	-	-	-	-
17127111	FFPE	Pancreas	67	M	-	-	-	Y	-	-	-	-	-	-	-	-	-	-
18020348	FT	Pancreas	65	M	-	-	-	Y	-	-	-	-	-	-	-	-	-	-
19010561	FT	Pancreas	49	M	-	-	-	Y	-	-	-	-	-	-	-	-	-	-
190618047	FFPE	Pancreas	49	F	-	Y	Y	-	-	-	-	-	-	-	-	-	-	-
191136118	FFPE	Penis	37	M	-	Y	-	-	-	-	-	-	-	-	-	-	-	-
18030841	FT	Prostate	69	M	-	-	-	Y	-	-	-	-	-	-	-	-	-	-
191139230	FT	Prostate	62	M	-	-	-	Y	-	-	-	-	-	-	-	-	-	-
190405196	FFPE	Prostate	76	M	-	Y	-	-	-	-	-	-	-	-	-	-	-	-
190827642	FFPE	Prostate	75	M	-	-	Y	-	-	-	-	Y	-	-	1	Y	-	N
191138706	FFPE	Sarcoma	49	M	-	Y	Y	-	-	-	Y	-	-	-	1	Y	-	N
18126735	FT	Sarcoma	53	F	-	-	Y	-	-	-	-	-	-	-	-	-	-	-
200201811	FFPE	Sarcoma	15	F	-	-	-	Y	-	-	-	-	-	-	-	-	-	-
190721438	FFPE	Sarcoma	55	F	-	Y	-	Y	-	-	-	-	-	-	-	-	-	-
18094549	FT	Sarcoma	43	F	-	-	-	Y	-	-	-	-	-	-	-	-	-	-
17126975	FFPE	Sarcoma	47	M	-	-	-	Y	-	-	-	-	-	-	-	-	-	-
18020367	FT	Sarcoma	47	M	-	-	-	Y	-	-	-	-	-	-	-	-	-	-
18030816	FT	Sarcoma	52	F	-	-	-	Y	-	-	-	-	-	-	-	-	-	-
18041380	FT	Sarcoma	58	M	-	-	-	Y	-	-	-	-	-	-	-	-	-	-
191035313	FFPE	Sarcoma	63	M	-	Y	Y	-	-	-	-	-	-	-	-	-	-	-
19010623	FFPE	Sarcoma	45	M	-	Y	Y	-	-	-	-	-	-	-	-	-	-	-
190200896	FT	Small Intestine	70	M	-	-	-	Y	-	-	-	-	-	-	-	-	-	-
17127063	FT	Small Intestine	56	M	-	-	-	Y	-	-	-	-	-	-	-	-	-	-
18084492	FFPE	Small Intestine	28	F	-	-	Y	-	-	-	-	-	-	-	-	-	-	-
191136714	FT	Thymus	26	M	-	Y	-	Y	-	-	Y	-	-	-	1	Y	-	N
190513304	FFPE	Unavailable	43	F	-	Y	-	-	-	-	Y	-	-	-	1	Y	-	N
190513293	FFPE	Unavailable	34	F	-	Y	-	-	-	-	-	-	-	-	-	-	-	-
191136590	FFPE	Unavailable	32	F	-	-	Y	-	-	-	-	-	-	-	-	-	-	-
191136589	FFPE	Unavailable	52	F	-	-	Y	-	-	-	-	-	-	-	-	-	-	-
19010300	FFPE	Unavailable	34	M	-	-	Y	-	-	-	-	-	-	-	-	-	-	-
190406755	FFPE	Unavailable	43	F	-	-	Y	-	-	-	-	-	-	-	-	-	-	-
190406722	FFPE	Unavailable	37	M	-	-	Y	-	-	-	-	-	-	-	-	-	-	-
19010302	FFPE	Unavailable	58	M	-	-	Y	-	-	-	-	-	-	-	-	-	-	-
18126726	FFPE	Unknown Primary	66	M	-	Y	-	-	-	-	Y	-	-	-	1	Y	-	N
18020628	FT	Uterine	66	F	-	-	-	Y	-	-	-	-	-	-	-	-	-	-
191239850	FFPE	Uterine	80	F	-	-	-	Y	-	-	-	-	-	-	-	-	-	-
190720753	FFPE	Uterine	62	F	-	Y	Y	-	-	-	Y	-	-	-	1	Y	-	N
18127354	FFPE	Uterine	55	F	-	-	Y	-	-	-	-	-	-	-	-	-	-	-
190510427	FFPE	Uterine + Ovary	56	F	-	-	Y	-	-	-	-	-	-	-	-	-	-	-
191137753	FFPE	Vulva	47	F	-	Y	Y	-	-	-	-	-	-	-	-	-	-	-
					133	112	105	138	128	19	22	1	6	45		73	29	19
